# Supplementary material
Source: publisher figshare collection journal article supplement (https://tandf.figshare.com/ndownloader/files/15265127)
Supplement: Supplementary file 1 [file 15265127]

#NEXUS																																																																																																																																																																																																																																																			
BEGIN DATA;
DIMENSIONS NTAX=41 NCHAR=126;
Format datatype=standard interleave=no GAP=- MISSING=? ;

MATRIX

Hypochilus_pococki	0000000000--10000000000--000-000000--0001000-0000110--00-0--00-0--0000000-0101020-0000-010100--0--00111??10000-0001000-01000-0
Hickmania_troglodytes	0000000000--10000010200--000-000000--0001000-0100100--00-0--1130--0000000-0101000-0000-010100--101000-0??0-000-000100110100101
Lycosidae_sp.	0000002030--10010000000--000-01-000--000101112001100--00-0--10-0--0010000-200?000-0000-010110--0--00101??0-000-0000-----001101
Araneus_sp.	0000011010--11010000000--000-01-000--0101010-0111000--00-0--00-0--0010000-2001010-0100-010110--0--011010012000-0010-----110111
Badumna_longinqua	0001001030--10010000000--000-01-000--010100102000100--00-0--00-0--0010000-2000000-0100-010110--0--00111??0-0013000110101101101
Dysdera_sp.	001---0000--00120000110--000-100000--0100100-0000000--00-0--00-0--0000000-2100010-0001000-101000--100-1??0-000-0000-----000020
Holarchaea_sp.	000000?040--0000-010000--000-01-000--1001000-011(01)100--10-0--00-0--1000010-2000010-0000-010010--0--010-0??0-010-0000-----011101
Kukulcania_hibemalis	0000000100--10000000000--000-21-000--0001000-2020000--00-0--00-0--0001100-1101010-0000-010100--0--100-01?0-000-000111111000000
Loxosceles_sp.	001---0000--10000000010--000-000000--0000000-002(01)210--00-0--0140--0001100-2001010-0000-110100--0--100-0??0-000-0000-----001020
Mimetus_sp.	4201011010--10000000000--000-01-000--0001000-01110010000-10000-0000000110-2001010-0000-010110--0--01101??12000-0000-----010111
Pararchaeidae_sp.	000000101121000040000010-000-01-000--0001000-0111110--01010000-0100000010-200101120000-010110--0--00111??12000-0000-----011121
Stegodyphus_sp.	0000003000--00003010000--000-21-000--0101000-0020210--00-0--00-0--0010000-2001010-0000-010110--0--00110??0-000-0001100-0100101
Uroctea_sp.	0001000000--10000000000--000-01-000--0101000-0020100--00-0--00-0--0000000-2001010-0000-010110--0--00101000-000-0000-----000121
Gnaphosidae_sp.	0000021000--10025010000--000-01-00121010000112020100--00-0--00-0--0010000-20110(01)0-0000-010110--0--000-1??0-00100000-----101101
Palpimanus_sp.	00010010213013100001110--011211-00100012(01)(01)00-0000210--00-10001000-1000010-200011120101110-000--111?0???110-000-0010-----001121
Colopea_sp.	00010011212010100001010--001010000101012(01)000-0000210--00-0--0100--1000010-200010130101110-200--11000100??0-000-0010-----001121
Huttonia_sp.	0001001010--00100000000--001031-0012101(12)1000-00(01)0210--00-1110110101000010-2000010-01011110000--11100101??0-000-0010-----001121
Aotearo_amagna	12000010111101101011?010-0011101000--01(12)1000-0??0?11001111100100111000010-200?1?0-0?00-111?00--11100101??0-00111010-----??1???
Mesarchaea_bellavista	121---10(12)11101101011001110011101000--01(12)1000-0??0?11001111100110111000010-20011?0-0?00-1???0??????0010???0-00121010-----??1???
Mecysmauchenius_segmentatus	001---101111011010111010-0011101000--01(12)1000-00(01)0211001111100120111000010-2001100-0000-111200--1010010?1?1000111010-----011121
Chilarchaea_quellon	001---101111011010110010-0011101000--01(12)1000-00(01)0111011111100120(12)-1000010-2001100-0100-11-200--101000-0??1100111010-----001121
Zearchaea_sp.	2200001011110110(12)0110010-0011101000--01(12)1000-00(01)0211001111000100001000010-2001100-0100-111200--11100101??0-10111010-----011121
Eriauchenius_lavatenda	2101111021010211211110111011111-111211111000-01(01)02110010-1110101101100010-210000111111010-101100--00101??0-010-0110-----011101
Eriauchenius_jeanneli	2101111021010211210110110011111-111211111000-0????110010-1110101101100010-21000?111?11000-101100--00101??0-010-0110-----??1???
Eriauchenius_legendrei	2101111021010211210110111011111-1112?1111000-0????110010-1110101101100010-21000?111?11000-101000--00101??0-110-0110-----??1???
Eriauchenius_workmani	1001111021010211211110111011111-111211111000-01(01)02110010-11101011011000111210000111111000-101100--00101??0-000-0110-----011101
Eriauchenius_bourgini	1101111021010211210110110011111-111211111000-0????110010-1110101101100010-21000?111?11000-101100--00101??0-000-0010-----??1???
Afrarchaea_sp.	1101111021010211210110111011111-111111111000-0????110010-1110101101100010-21000?111?11000-101110--00101??0-000-0110-----??1???
Afrarchaea_woodae	1101111021010211210110111011111-111101111000-01(01)02110010-1110101101100010-210000111111000-101110--00101??0-000-0110-----011121
Austrarchaea_nodosa	1001101021010211210110110011111-111201111000-01(01)02111110-11101011011000110211100111111000-100--10000101??0-000-0110-----011101
Austrarchaea_daviesae	1001101021010211210110110011111-111211111000-0????111110-11101011011000110211?0?111?11000-100--10000101??0-000-0110-----??1???
Austrarchaea_mainae	0001101021010211210110110011111-111201111000-0????111110-11101011011000110211?0?111?11000-100--10000101??0-000-0010-----??1???
Archaea_paradoxa	000110?02101001?21011?11110111??111??11?1000-0????10--10-111?100111100010-??1?0?111?10-10-?0??????00101??0-000-0010-----??????
Burmesarchaea_grimaldii	000110?02101001???011?11110?????1????11?1000-0????10--10-11??1?010??00010-????0???1?10-???????????0010???0-000-01?0-----??????
Myrmecarchaea_sp.	000110?011?100????01??11110?????011??11???0???????10--?0-1?????011??00010-????0???1?1?????????????????????????????0-----??????
Baltarchaea_conica	100110?0211100??2?011?11110?????01???11???0???????10--10-1???1001???00011(01)????0???1?1??????0??????????????????????0-----??????
Patarchaea_muralis	?????????1????????????11?1??????0?11??1?10????????10--10-11??1101?1?0001?????????????0-?10????????0??????0-??11???0-----??????
Caestaranea_jurassica	000?0?????--??1??????010-0???3??00110011100???????10--011111010010?0000?0-??1???0-0000-?10?????????0???????000-???0-----??????
Onychopalpus_thomisoides	000?0?????--????????0010-0???3??00121010100???1???00--011111010010?0000?0-??1???0-0000-?10?????????0???????000-???0-----??????
Sinaranea_brevicrus	000?0?????--?????????000-0???0??0012101?100???????00--011111010010?0000?0-??1???0-0000-?10?????????0???????000-???0-----??????
Sinaranea_metaxyostraca	000?0?????--?????????000-0???0??001?1011100???????00--0??111010010?0000?0-??1???0-0000-?10?????????0???????000-???0-----??????
;

END;

begin mrbayes;

set autoclose=yes nowarn=yes;

[charsets that define the partitioning scheme] 

[setting evolutionary models for the partitioning]
[Models for partitions]

[We Use Mkv+G For Morph Data]
lset coding=variable rates=gamma;

[Unlink Parameters And Allow Relative Partition Rates]
[unlink statefreq=(all) revmat=(all) shape=(all) pinvar=(all);
prset applyto=(all) ratepr=variable;]

[outgroup, taxon sets and constraints]
[Calibrations]

[Setting Priors on Parameters]

[mcmc settings]
set usebeagle=yes beagledevice=CPU beagleprecision=double beaglescaling=always beaglesse=no beagleopenmp=no;
mcmcp temp=0.1 nchain=4 samplefreq=500 printfr=1000 nruns=2 append=no;
mcmcp filename=topology_run;
mcmc ngen=5000000;

sumt relburnin =yes burninfrac = 0.25;
sump relburnin =yes burninfrac = 0.25;
end;
